# Supplementary material for: Trans-Cinnamaldehyde Attenuates Enterococcus faecalis Virulence and Inhibits Biofilm Formation
Source: MDPI journal article supplement (doi:10.3390/antibiotics10060702), 2021-06-11
Supplement: s1 [file s1]

## Article

# Trans-Cinnamaldehyde Attenuates *Enterococcus faecalis* Virulence and Inhibits Biofilm Formation

Islam A. A. Ali <sup>1</sup>, Jukka P. Matinlinna <sup>1</sup>, Celine M. Lévesque <sup>2</sup> and Prasanna Neelakantan <sup>1,\*</sup>

<sup>1</sup> Faculty of Dentistry, The University of Hong Kong, Hong Kong, China; u3004980@connect.hku.hk (I.A.A.); jpmat@hku.hk (J.P.M.); prasanna@hku.hk (P.N.)

<sup>2</sup> Faculty of Dentistry, University of Toronto, Toronto, ON M5G 1G6, Canada; Celine.Levesque@dentistry.utoronto.ca

\* Correspondence: [prasanna@hku.hk](mailto:prasanna@hku.hk); Tel.: +852-2859-0581

**Table S1.** Sequence of primers used in the qRT-PCR analysis.

| Gene        | Sequence (5'-3')                                               | Function                                                                                              | References |
|-------------|----------------------------------------------------------------|-------------------------------------------------------------------------------------------------------|------------|
| 23S rRNA    | F- CCTATCGGCCTCGGCTTAG<br>R- AGCGAAAGACAGGTGAGAATCC            | Housekeeping gene                                                                                     | [1]        |
| <i>fsrB</i> | F- TGCTCAAAAAGCAAAGCCTTATAA<br>R- GATGACGAGACCGTAGAGTATTACTGAA | Processing of a peptide precursor to generate GBAP *                                                  | [1]        |
| <i>fsrC</i> | F- GCTTATTTGGAAGAACAACGTATCAA<br>R- CGAAACATCGCTAGCTCTTCGT     | Histidine kinase sensor of the Fsr quorum sensing system                                              | [1]        |
| <i>gelE</i> | F- CGGAACATACTGCCGGTTTAGA<br>R- TGGATTAGATGCACCCGAAAT          | Production of an extracellular protease involved in biofilm formation and degradation of host tissues | [1]        |
| <i>luxS</i> | F- TGCAGAGACTGCTGGAACAACCT<br>R- GGGTTGCCGCACTGGTTTTATATGA     | Encodes a metalloenzyme involved in AI-2 production                                                   | This study |
| <i>ftsZ</i> | F- CCGTCAAAACAAGACAAGCGG<br>R- TCCCAATCGCCAAAAGCACT            | Cell division                                                                                         | [2]        |

\* GBAP: Gelatinase Biosynthesis Activating Pheromone, the peptide autoinducer of the Fsr-quorum sensing system in *E. faecalis*.

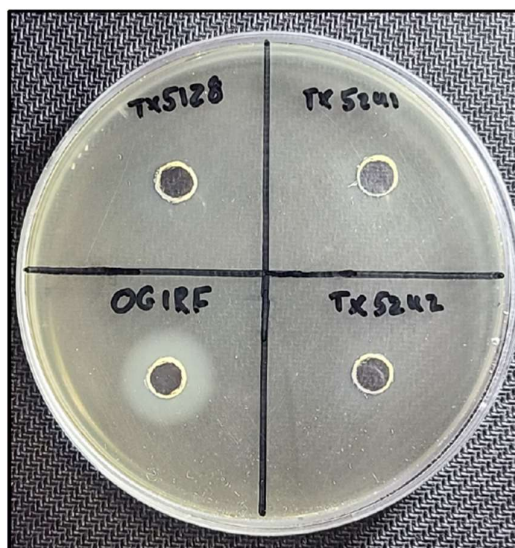

**Figure S1.** Extracellular protease activity of the wild-type OG1RF, *gelE* (TX 5128), *fsrB* (TX 5241) and *fsrC* (TX 5242) mutant strains. The presence of opaque zone surrounding the OG1RF strain indicates positive protease activity, while no opaque zones were observed surrounding the *fsr* or *gelE* mutants, which indicate negative protease activity.

## References

1. Shepard, B.D.; Gilmore, M.S. Differential Expression of Virulence-Related Genes in *Enterococcus faecalis* in Response to Biological Cues in Serum and Urine. *Infect. Immun.* **2002**, *70*, 4344–4352, doi:10.1128/iai.70.8.4344-4352.2002.
2. He, Z.; Liang, J.; Zhou, W.; Xie, Q.; Tang, Z.; Ma, R.; Huang, Z. Effect of the quorum-sensing luxS gene on biofilm formation by *Enterococcus faecalis*. *Eur. J. Oral Sci.* **2016**, *124*, 234–240, doi:10.1111/eos.12269.
